# Supplementary material for: Catapulting of topological defects through elasticity bands in active nematics
Source: Royal Society of Chemistry journal article supplement (doi:10.1039/d2sm00414c), 2022-01-01
Supplement: d2sm00414c1.pdf [file d2sm00414c1.pdf]

## Supplemental Movie Legends

**Movie S1.** Fluorescent actin in an active liquid crystal with low elasticity ( $K_{11} = 0.26$  pN,  $K_{33} = 0.13$  pN) driven by myosin II motors (unlabeled).

**Movie S2.** Fluorescent actin in an active liquid crystal with high elasticity ( $K_{11} = 0.52$  pN,  $K_{33} = 1.04$  pN) driven by myosin II motors (unlabeled).

**Movie S3.** Fluorescent actin (grayscale) in an active liquid crystal doped with a sparse quantity of microtubules (red) ( $K_{11} = 0.26$  pN,  $K_{33} = 1.04$  pN) and driven by myosin II motors.

**Movie S4.** Hydrodynamic simulation of active nematic with black lines indicating local nematic director field and heat scale indicates magnitude of bend distortion.

**Movie S5.** Fluorescent actin images of a band in an active nematic, illustrating the motion of a  $+1/2$  defect (blue chevron) through a band leaving a uniform nematic in its wake.

**Movie S6.** Fluorescent actin images of a band in an active nematic, illustrating its annihilation through creation of a  $\pm 1/2$  defect pair (blue and red arrows) and their catapulting through the nematic.

**Movie S7.** Fluorescent actin images of a band in an active nematic, showing distinct dynamics of  $+1/2$  defects. The  $+1/2$  defect indicated by the blue arrow moves at a much greater speed than that of the surrounding nematic and defects (e.g. red arrow), due to its “catapulting” via band annihilation.

**Movie S8.** Fluorescent actin in an active liquid crystal with high elasticity ( $K_{11} = 0.52$  pN,  $K_{33} = 1.04$  pN) driven by myosin VI motors (unlabeled). The bands show a tendency to switch between two orthogonal directions periodically.
